# Supplementary material for: Genome-Wide Identification and Structural Analysis of bZIP Transcription Factor Genes in Brassica napus
Source: MDPI journal article supplement (doi:10.3390/genes8100288), 2017-10-24
Supplement: s1 [file s1]

|           | 10 | 20 | 30 | 40 | 50 | 60    | 70                                        | 80    | 90               |              |              |               |               |          |    |
|-----------|----|----|----|----|----|-------|-------------------------------------------|-------|------------------|--------------|--------------|---------------|---------------|----------|----|
| BnbZIP12a |    |    |    |    |    |       |                                           | -MGS  | LRGNVEEPI        | ISQ-SLPR     | 18           |               |               |          |    |
| BnbZIP12b |    |    |    |    |    |       |                                           | -MGS  | LRGNAEEPI        | ISQ-SLPR     | 18           |               |               |          |    |
| BnbZIP12c |    |    |    |    |    |       |                                           | -MGS  | LRGDMEEPI        | IHQ-SLPR     | 18           |               |               |          |    |
| BnbZIP12d |    |    |    |    |    |       |                                           | -MGS  | LRGNVEEPI        | IHQ-SLPR     | 18           |               |               |          |    |
| BnbZIP14a |    |    |    |    |    |       |                                           |       |                  |              | 1            |               |               |          |    |
| BnbZIP14b |    |    |    |    |    |       |                                           |       |                  |              | 1            |               |               |          |    |
| BnbZIP14c |    |    |    |    |    |       |                                           |       |                  |              | 1            |               |               |          |    |
| BnbZIP14d |    |    |    |    |    |       |                                           |       |                  |              | 1            |               |               |          |    |
| BnbZIP14e |    |    |    |    |    |       |                                           |       |                  |              | 1            |               |               |          |    |
| BnbZIP14f |    |    |    |    |    |       |                                           |       |                  |              | 1            |               |               |          |    |
| BnbZIP27b |    |    |    |    |    |       |                                           |       |                  |              | 1            |               |               |          |    |
| BnbZIP27a |    |    |    |    |    |       |                                           |       |                  |              | 1            |               |               |          |    |
| BnbZIP38e |    |    |    |    |    |       |                                           |       |                  |              | 1            |               |               |          |    |
| BnbZIP38f |    |    |    |    |    | -MGTH | INFNNLGGG                                 | -     | -DPGGEGFNQMKPTDT | -            | AYPLAR       | 34            |               |          |    |
| BnbZIP37a |    |    |    |    |    | -MGTH | INFNNLGGEG                                | -     | -                | MKPTDN       | -            | AYPLAR        | 26            |          |    |
| BnbZIP37b |    |    |    |    |    | -MGS  | RMNFVDVVRDEV                              | -     | -                | INAKQPALGS   | -            | GLPLTR        | 31            |          |    |
| BnbZIP37c |    |    |    |    |    | -MGS  | RFNFVD                                    | -     | -                | DAKQPALGT    | -            | GVPLTR        | 24            |          |    |
| BnbZIP37d |    |    |    |    |    | -MGS  | QFNFVD                                    | -     | -                | DAKQPALGA    | -            | GVPLTR        | 24            |          |    |
| BnbZIP38a |    |    |    |    |    | -MGTH | INFNNLGGGGGGGGDPGGEGFNQMKATDT             | -     | -                | AYPLAR       | -            | 39            |               |          |    |
| BnbZIP38b |    |    |    |    |    | -MGTH | INFNNLGGGGG                               | -     | -                | NQMKPTDT     | -            | PNPLAR        | 29            |          |    |
| BnbZIP38c |    |    |    |    |    | -MGTH | INFNNLGGGGG                               | -     | -                | GEGSNQMKPTDN | -            | AYPLAR        | 33            |          |    |
| BnbZIP38d |    |    |    |    |    | -MGTH | INFNSLGGGGG                               | -     | -                | YQMKPTDS     | -            | PNPLAR        | 29            |          |    |
| BnbZIP39a |    |    |    |    |    | -MVG  | RETKMMSGREVESST                           | -     | -                | RHNGGAGAGGG  | -            | ENHPFTSLGR    | 39            |          |    |
| BnbZIP39b |    |    |    |    |    | -MVG  | RETEMMSEREVETSTAQARQNGGAGGG               | -     | -                | ENHPFSSSLGR  | -            | 40            |               |          |    |
| BnbZIP39c |    |    |    |    |    | -MVS  | RETEMMSEREVETSTAQARQNGGAGGGGGGENHPFSSSLGR | -     | -                | 43           |              |               |               |          |    |
| BnbZIP40a |    |    |    |    |    | -     | MASF                                      | KMMSS | -                | -            | STSRNSDLSRRN | SSASS         | 27            |          |    |
| BnbZIP40b |    |    |    |    |    | -     | MASF                                      | KMMSS | -                | -            | STSRNSDLSRRN | SSASS         | 27            |          |    |
| BnbZIP66a |    |    |    |    |    |       |                                           |       |                  | -MDS         | QR           | -             | EPKSH-SLNR    | 14       |    |
| BnbZIP66b |    |    |    |    |    |       |                                           |       |                  | -MDS         | Q            | R             | VIEDPKSP-SLNR | 18       |    |
| BnbZIP66c |    |    |    |    |    |       |                                           |       |                  | -MDS         | QR           | -             | EP            | SRHQSLNR | 15 |
| BnbZIP66d |    |    |    |    |    |       |                                           |       |                  | -MDS         | HR           | VIEDPKSQ-FLNR | 18            |          |    |
| BnbZIP66e |    |    |    |    |    |       |                                           |       |                  | -MDS         | QR           | -             | EPKSH-SLNR    | 14       |    |
| BnbZIP66f |    |    |    |    |    |       |                                           |       |                  | -MDS         | QR           | -             | EP            | SRHQSLNR | 15 |
| BnbZIP67a |    |    |    |    |    |       |                                           |       |                  |              |              |               |               | 52       |    |
| BnbZIP67b |    |    |    |    |    |       |                                           |       |                  |              |              |               |               | 52       |    |
| BnbZIP17a |    |    |    |    |    |       |                                           |       |                  |              |              |               |               | 43       |    |
| BnbZIP17b |    |    |    |    |    |       |                                           |       |                  |              |              |               |               | 47       |    |
| BnbZIP17c |    |    |    |    |    |       |                                           |       |                  |              |              |               |               | 44       |    |
| BnbZIP17d |    |    |    |    |    |       |                                           |       |                  |              |              |               |               | 44       |    |
| BnbZIP17e |    |    |    |    |    |       |                                           |       |                  |              |              |               |               | 55       |    |
| BnbZIP17f |    |    |    |    |    |       |                                           |       |                  |              |              |               |               | 58       |    |
| BnbZIP17g |    |    |    |    |    |       |                                           |       |                  |              |              |               |               | 24       |    |
| BnbZIP17h |    |    |    |    |    |       |                                           |       |                  |              |              |               |               | 24       |    |
| BnbZIP17i |    |    |    |    |    |       |                                           |       |                  |              |              |               |               | 7        |    |
| BnbZIP17j |    |    |    |    |    |       |                                           |       |                  |              |              |               |               | 7        |    |
| BnbZIP17k |    |    |    |    |    |       |                                           |       |                  |              |              |               |               | 7        |    |
| BnbZIP17l |    |    |    |    |    |       |                                           |       |                  |              |              |               |               | 7        |    |
| BnbZIP10a |    |    |    |    |    |       |                                           |       |                  |              |              |               |               | 15       |    |
| BnbZIP10b |    |    |    |    |    |       |                                           |       |                  |              |              |               |               | 15       |    |
| BnbZIP25a |    |    |    |    |    |       |                                           |       |                  |              |              |               |               | 1        |    |
| BnbZIP25b |    |    |    |    |    |       |                                           |       |                  |              |              |               |               | 15       |    |
| BnbZIP25c |    |    |    |    |    |       |                                           |       |                  |              |              |               |               | 15       |    |
| BnbZIP25d |    |    |    |    |    |       |                                           |       |                  |              |              |               |               | 1        |    |
| BnbZIP25e |    |    |    |    |    |       |                                           |       |                  |              |              |               |               | 15       |    |
| BnbZIP25f |    |    |    |    |    |       |                                           |       |                  |              |              |               |               | 1        |    |
| BnbZIP63a |    |    |    |    |    |       |                                           |       |                  |              |              |               |               | 16       |    |
| BnbZIP63b |    |    |    |    |    |       |                                           |       |                  |              |              |               |               | 16       |    |
| BnbZIP63c |    |    |    |    |    |       |                                           |       |                  |              |              |               |               | 17       |    |
| BnbZIP63d |    |    |    |    |    |       |                                           |       |                  |              |              |               |               | 17       |    |
| BnbZIP20a |    |    |    |    |    |       |                                           |       |                  |              |              |               |               | 1        |    |
| BnbZIP20b |    |    |    |    |    |       |                                           |       |                  |              |              |               |               | 1        |    |
| BnbZIP45d |    |    |    |    |    |       |                                           |       |                  |              |              |               |               | 1        |    |
| BnbZIP45e |    |    |    |    |    |       |                                           |       |                  |              |              |               |               | 1        |    |
| BnbZIP45a |    |    |    |    |    |       |                                           |       |                  |              |              |               |               | 1        |    |
| BnbZIP45b |    |    |    |    |    |       |                                           |       |                  |              |              |               |               | 1        |    |
| BnbZIP45c |    |    |    |    |    |       |                                           |       |                  |              |              |               |               | 1        |    |
| BnbZIP45f |    |    |    |    |    |       |                                           |       |                  |              |              |               |               | 1        |    |
| BnbZIP26a |    |    |    |    |    |       |                                           |       |                  |              |              |               |               | 1        |    |
| BnbZIP26b |    |    |    |    |    |       |                                           |       |                  |              |              |               |               | 1        |    |
| BnbZIP21a |    |    |    |    |    |       |                                           |       |                  |              |              |               |               | 1        |    |
| BnbZIP21b |    |    |    |    |    |       |                                           |       |                  |              |              |               |               | 1        |    |
| BnbZIP21c |    |    |    |    |    |       |                                           |       |                  |              |              |               |               | 1        |    |
| BnbZIP21d |    |    |    |    |    |       |                                           |       |                  |              |              |               |               | 1        |    |
| BnbZIP22a |    |    |    |    |    |       |                                           |       |                  |              |              |               |               | 1        |    |
| BnbZIP22b |    |    |    |    |    |       |                                           |       |                  |              |              |               |               | 1        |    |
| BnbZIP22c |    |    |    |    |    |       |                                           |       |                  |              |              |               |               | 1        |    |
| BnbZIP22d |    |    |    |    |    |       |                                           |       |                  |              |              |               |               | 1        |    |
| BnbZIP50c |    |    |    |    |    |       |                                           |       |                  |              |              |               |               | 1        |    |
| BnbZIP50d |    |    |    |    |    |       |                                           |       |                  |              |              |               |               | 1        |    |
| BnbZIP46a |    |    |    |    |    |       |                                           |       |                  |              |              |               |               | 1        |    |
| BnbZIP46b |    |    |    |    |    |       |                                           |       |                  |              |              |               |               | 1        |    |
| BnbZIP47a |    |    |    |    |    |       |                                           |       |                  |              |              |               |               | 1        |    |
| BnbZIP47b |    |    |    |    |    |       |                                           |       |                  |              |              |               |               | 1        |    |
| BnbZIP47c |    |    |    |    |    |       |                                           |       |                  |              |              |               |               | 1        |    |
| BnbZIP47d |    |    |    |    |    |       |                                           |       |                  |              |              |               |               | 1        |    |
| BnbZIP47e |    |    |    |    |    |       |                                           |       |                  |              |              |               |               | 1        |    |
| BnbZIP50b |    |    |    |    |    |       |                                           |       |                  |              |              |               |               | 1        |    |
| BnbZIP50a |    |    |    |    |    |       |                                           |       |                  |              |              |               |               | 1        |    |
| BnbZIP57a |    |    |    |    |    |       |                                           |       |                  |              |              |               |               | 1        |    |
| BnbZIP57b |    |    |    |    |    |       |                                           |       |                  |              |              |               |               | 1        |    |
| BnbZIP57c |    |    |    |    |    |       |                                           |       |                  |              |              |               |               | 1        |    |
| BnbZIP57d |    |    |    |    |    |       |                                           |       |                  |              |              |               |               | 1        |    |
| BnbZIP65a |    |    |    |    |    |       |                                           |       |                  |              |              |               |               | 1        |    |
| BnbZIP65b |    |    |    |    |    |       |                                           |       |                  |              |              |               |               | 1        |    |
| BnbZIP65c |    |    |    |    |    |       |                                           |       |                  |              |              |               |               | 1        |    |
| BnbZIP34a |    |    |    |    |    |       |                                           |       |                  |              |              |               |               | 1        |    |
| BnbZIP34b |    |    |    |    |    |       |                                           |       |                  |              |              |               |               | 1        |    |
| BnbZIP34c |    |    |    |    |    |       |                                           |       |                  |              |              |               |               | 1        |    |
| BnbZIP34d |    |    |    |    |    |       |                                           |       |                  |              |              |               |               | 1        |    |
| BnbZIP34e |    |    |    |    |    |       |                                           |       |                  |              |              |               |               | 1        |    |
| BnbZIP61a |    |    |    |    |    |       |                                           |       |                  |              |              |               |               | 1        |    |
| BnbZIP61b |    |    |    |    |    |       |                                           |       |                  |              |              |               |               | 1        |    |
| BnbZIP61c |    |    |    |    |    |       |                                           |       |                  |              |              |               |               | 1        |    |
| BnbZIP19a |    |    |    |    |    |       |                                           |       |                  |              |              |               |               | 1        |    |
| BnbZIP19b |    |    |    |    |    |       |                                           |       |                  |              |              |               |               | 1        |    |
| BnbZIP19c |    |    |    |    |    |       |                                           |       |                  |              |              |               |               | 1        |    |
| BnbZIP23b |    |    |    |    |    |       |                                           |       |                  |              |              |               |               | 1        |    |
| BnbZIP23a |    |    |    |    |    |       |                                           |       |                  |              |              |               |               | 1        |    |
| BnbZIP23c |    |    |    |    |    |       |                                           |       |                  |              |              |               |               | 1        |    |
| BnbZIP23d |    |    |    |    |    |       |                                           |       |                  |              |              |               |               | 1        |    |
| BnbZIP24a |    |    |    |    |    |       |                                           |       |                  |              |              |               |               | 1        |    |
| BnbZIP24b |    |    |    |    |    |       |                                           |       |                  |              |              |               |               | 1        |    |
| BnbZIP16a |    |    |    |    |    |       |                                           |       |                  |              |              |               |               | 86       |    |
| BnbZIP16b |    |    |    |    |    |       |                                           |       |                  |              |              |               |               | 19       |    |
| BnbZIP16c |    |    |    |    |    |       |                                           |       |                  |              |              |               |               | 19       |    |
| BnbZIP68a |    |    |    |    |    |       |                                           |       |                  |              |              |               |               | 19       |    |
| BnbZIP68b |    |    |    |    |    |       |                                           |       |                  |              |              |               |               | 19       |    |
| BnbZIP16d |    |    |    |    |    |       |                                           |       |                  |              |              |               |               | 1        |    |
| BnbZIP16e |    |    |    |    |    |       |                                           |       |                  |              |              |               |               | 1        |    |
| BnbZIP41a |    |    |    |    |    |       |                                           |       |                  |              |              |               |               | 19       |    |
| BnbZIP41b |    |    |    |    |    |       |                                           |       |                  |              |              |               |               | 19       |    |

|           |                                                                                            |     |
|-----------|--------------------------------------------------------------------------------------------|-----|
| BnbZIP666 | QD--SSLSYSLTLTDEVQTHLD--SGSKALGSMNLDDELLKSVCSDSNG-----DT                                   | 59  |
| BnbZIP66f | QG--SLSYSLTLTDEVQTHLG--SSGKALGSMNLDDELLKSVCSDS-----                                        | 52  |
| BnbZIP67a | QN--SIMSLSLTLDIEIQMK---SGKSFGAMNMDELLANMWMVTVEENNNGGGAGAQDGEK--                            | 104 |
| BnbZIP67b | QN--SIMSLSLTLDIEIQMK---SGKSFGAMNMDELLANMWMVTVEENNNGGGAGAQDGEK--                            | 104 |
| BnbZIP17a | ADFELTFDGMEDLYLPAEDETFLLPDNGS---NQEQFGDFTPESEGSIFGDTDKNIHR-NSESPKDSDDDRCSGDE---RTLDDQLS-   | 122 |
| BnbZIP17b | ADFELTFDGMEDLYLPAEDETFLLPDNAS---NQEQFGDFTPTES-----DDERTLDQ-STPLSSSQGSNDNCGSDVS---EAVDQKVK  | 121 |
| BnbZIP17c | GDFELTFDGMEDVYLPANETFLIP---G---NQEQFGDFTPESEGS GDCLPKDADKSKSATPLSSSQGSNGCGSDVSEGTTVVDQKVK  | 126 |
| BnbZIP28a | ADLDFSFDSDVDFDFDLADLPVAITES-----IATHADMDSPEIKIVDRGLEDRSDSVHSQVSSSQGSK-----                 | 120 |
| BnbZIP28b | ADLDFSFDSDVDFDFDLDAEPVVAISEELGSSGDQSPEDIAHANLDSPEEKIVDRGLEDRSDSVHSQVSSSQGSKTSGGCDTLSSSPENS | 148 |
| BnbZIP49a | VDFELTFE--DLYFPSEGESFFIP-----VEVEEKATTTTCKTSM-----                                         | 61  |
| BnbZIP49b | VDFELTFD--DLYFPSENESEFFIP-----VDVEEEATTTTCKTSM-----                                        | 61  |
| BnbZIP96a | -----DTGMKRSASELALQEYLTTKVIPLDPS-----FDPMNQDHTGELRDRHLL-----                               | 51  |
| BnbZIP9b  | -----DTGMKRSASELALQEYLTRVIPLEPS-----FDLKNQDHTGELRDRHLL-----                                | 51  |
| BnbZIP9c  | -----DIGMKKSASELALQELLTK-FPLDPS-----FDLMNWDYTCEL RDSLLK-----                               | 50  |
| BnbZIP9d  | -----DIGMKKSASELALQELLTK-FPLDPS-----FDLMNWDYTCEL RDSLLK-----                               | 50  |
| BnbZIP10a | ESSPPLDS-----DSAKALTAEEWTVEMFFLEEIIASSVTSAPVGSNNNNNNNAIVGVSSAQSLPSVSGQNDFEEDSRFLRR-----    | 89  |
| BnbZIP10b | ESSPPLDS-----DSAKAVAAEEWTVEMFFLEEIIASSVTSAPVGNNNNNNNNAIVGVSSAQSLPSVSGQNDFEEDSRFLRR-----    | 89  |
| BnbZIP25a | -----MTRSQSEWAFQRLLLKENS GSDQT-----NAIDRLSP-----VQSLSTVDETADVVEIQKPPRN-----                | 54  |
| BnbZIP25b | PPPPPEPSPGSVPSQTMPDGMTRSQSEWAFQRLLRMSGSDESP---TTINVRSPPPVQSEQSLSTVDETADVVEIQKPPPPPPRNPAD   | 101 |
| BnbZIP25c | PPPPPEPSPGSVSAQNMPDGMTRSQSEWAFQRLLRMSGSDESP---TTINVRSPPPVQSEQSLSTVDETSDDVVEIQKPPPP-----D   | 95  |
| BnbZIP25d | -----MVFTAS--THLKFFF-----INP-----FILSNLVHFSFTILLGS-----                                    | 33  |
| BnbZIP25e | PPPPPSPLSPG-----DGMTRSQSEWAFQMLLEEISSVPAG-----SSISSSSATDNAIGRSYTOVRSESSVSRTEEASSN-----     | 87  |
| BnbZIP25f | -----MDGVVIFYC SRLRCCTNLT-----RLLHLDLIPQQA FKR N-----                                      | 34  |
| BnbZIP63a | SELAEETNGTTAK-----GVMNRSDEWAFQRFIQESSSAGEA-----AYGVSVSGPPSPSPVPVDSEEYREFLKS KLN-----       | 84  |
| BnbZIP63b | SELAEETNGTTAK-----GMMNRSDEWAFQRFIQESSSAGEA-----VYGVSVSGPPSPSPVPVDSEEYREFLKS KLN-----       | 84  |
| BnbZIP63c | SEPAKESDGTSG-----MNRSDSEWAFHRRFIQESSAGED-----GVS VSGPSSP-----VDSHEYREILKS KLN-----         | 76  |
| BnbZIP63d | SEPAKESDGTSG-----MNRSDSEWAFHRSIQKSSAGEDAT-----AHGASDSGPSSP-----VDSHEYREILKS KLN-----       | 80  |
| BnbZIP20a | -----                                                                                      | 1   |
| BnbZIP20b | -----                                                                                      | 1   |
| BnbZIP45d | -----                                                                                      | 1   |
| BnbZIP45e | -----                                                                                      | 1   |
| BnbZIP45a | -----                                                                                      | 1   |
| BnbZIP45b | -----                                                                                      | 1   |
| BnbZIP45c | -----                                                                                      | 1   |
| BnbZIP45f | -----                                                                                      | 1   |
| BnbZIP26a | -----                                                                                      | 1   |
| BnbZIP26b | -----                                                                                      | 1   |
| BnbZIP21a | -----MATNHNHSHHLSYSLLHGLSNPPPPG                                                            | 27  |
| BnbZIP21b | -----MATNHNHSHHLSYSLLHGLSNPPPPG                                                            | 27  |
| BnbZIP21c | -----MDNHRVISEATNHNNDNHHLSYSLLHGLSNPPPPG                                                   | 35  |
| BnbZIP21d | -----                                                                                      | 1   |
| BnbZIP22a | -----                                                                                      | 1   |
| BnbZIP22b | -----MKTRC                                                                                 | 5   |
| BnbZIP22c | -----                                                                                      | 1   |
| BnbZIP22d | -----                                                                                      | 1   |
| BnbZIP50c | -----                                                                                      | 1   |
| BnbZIP50d | -----                                                                                      | 1   |
| BnbZIP46a | -----MQSSFKTVPFNPDFYSQASFFFRGDSCLDEFHQPI NGFHHDEAVGLSPNVT                                  | 51  |
| BnbZIP46b | -----MQSSFKTVPFNPDFYSQASFFFRGDSCLDEFHQPI NGFHHDEAVGLSPNVT                                  | 51  |
| BnbZIP47a | -----                                                                                      | 1   |
| BnbZIP47b | -----                                                                                      | 1   |
| BnbZIP47c | -----                                                                                      | 1   |
| BnbZIP47d | -----                                                                                      | 1   |
| BnbZIP47e | -----                                                                                      | 1   |
| BnbZIP50b | -----MLHPVSSSLRKK-----VEALQEF                                                              | 19  |
| BnbZIP50a | -----MLHSVLSLRLKKWSKNTLWKSHTSGLWALQEF                                                      | 32  |
| BnbZIP57a | -----                                                                                      | 1   |
| BnbZIP57b | -----                                                                                      | 1   |
| BnbZIP57c | -----                                                                                      | 1   |
| BnbZIP57d | -----                                                                                      | 1   |
| BnbZIP65a | -----MQGHHQNH HQQLSSASATSSSGNFMNKDGY                                                       | 30  |
| BnbZIP65b | -----MQGHHQNH HQQLSSASATSSNGNFMNKDGY                                                       | 30  |
| BnbZIP65c | -----MSTD-F                                                                                | 5   |
| BnbZIP34a | -----MAQLPPQIPNM-----TPHWP D-----                                                          | 17  |
| BnbZIP34b | -----MAQLPPKIPNM-----TPHWP D-----                                                          | 17  |
| BnbZIP34c | -----MAQLPPKIPNM-----TPHWP D-----                                                          | 17  |
| BnbZIP34d | -----MAQLPPKIPNM-----TPHWP D-----                                                          | 17  |
| BnbZIP34e | -----MAQLPPKIPNM-----TPHWP D-----                                                          | 17  |
| BnbZIP61a | -----MAQLPPKIPTMTTTTT-PHWP D-----                                                          | 20  |
| BnbZIP61b | -----MAQLPPKIPTMTTTTTTPHWP D-----                                                          | 21  |
| BnbZIP61c | -----MAQLPPKIPTMTTTTTTPHWP D-----                                                          | 21  |
| BnbZIP19a | -----                                                                                      | 1   |
| BnbZIP19b | -----                                                                                      | 1   |
| BnbZIP19c | -----                                                                                      | 1   |
| BnbZIP41d | -----                                                                                      | 1   |
| BnbZIP23b | -----                                                                                      | 1   |
| BnbZIP23a | -----                                                                                      | 1   |
| BnbZIP23c | -----                                                                                      | 1   |
| BnbZIP23d | -----                                                                                      | 1   |
| BnbZIP24a | -----                                                                                      | 1   |
| BnbZIP24b | -----                                                                                      | 1   |
| BnbZIP16a | ---PPP-SSQEPSSAVSAGMATPDWSGFQAY-SPMPPHGFVASSPQPHPYMWGVQHM-                                 | 138 |
| BnbZIP16b | ---PPPPSSQEPSSAVSAGMATPDWSGFQAY-SPMPPHGFVASSPQPHPYMWGVQHMN-                                | 73  |
| BnbZIP16c | S-SSAPPPSQEPSSSVSAG--PDWSGFQASSAPMQPHGFVTSSPQPHPYMWRVQHM-                                  | 72  |
| BnbZIP68a | S-SSAPVTSQEPSSAVAT--PDWSGFQAYSMPMP-HGYVASSPQPHPYMWGVQHM-                                   | 70  |
| BnbZIP68b | PPSSAPVTSQEPSSAVAT--PDWSGFQAYSMPMPPHGYVASSPQPHPYMWGVQHM-                                   | 72  |
| BnbZIP16d | -----                                                                                      | 1   |
| BnbZIP16e | -----                                                                                      | 1   |
| BnbZIP41a | QDTPP-----TPYADWSNSMQAAYYGGGGTSPSFFFPSPVGS PS--PHPYMWGAQH H-----                           | 67  |
| BnbZIP41b | QDTPP-----TPYADWSNSMQAAYYGGGGTSPSFFFPSPVGS PS--PHPYMWGAQH H-----                           | 67  |
| BnbZIP41c | QDIPP-----TPYPEWSNSMQAAYYGGGGTSPNFFFPSPVGS PS--PHPYMWGAQH H-----                           | 64  |
| BnbZIP41d | QDIPP-----TPYPDWSNSMQAAYYGGGGTSPSFFFPSPVGS PS--PHPYMWGAQH H-----                           | 64  |
| BnbZIP54a | APPPPEQSNVHVYHHDWAAMQAAYYGRVAITPQYYNSNGHAAP-PPPYIWGSPSP                                    | 70  |
| BnbZIP54b | APPPP-EQSNVHVYHHDWAAMQAAYYGRGAI TPQYYNSNGHAP-----PYIWGSPSP                                 | 74  |
| BnbZIP55a | PSSPPADQTNVHVYP-DWAAMQAAYYGRVAMPYYNSAMAAASGHPPPPPYMW N--PQH                                | 134 |

[illegible]

[illegible]

[illegible]





[illegible]

|           |                                                                                                 |                                                                                                 |                 |     |
|-----------|-------------------------------------------------------------------------------------------------|-------------------------------------------------------------------------------------------------|-----------------|-----|
| BnbZIP12a | P K W K - - - - -                                                                               | - L R R T S S A S F - - - - -                                                                   |                 | 274 |
| BnbZIP12b | P K W K - - - - -                                                                               | - L R R T S S A S F - - - - -                                                                   |                 | 282 |
| BnbZIP12c | P K W K - - - - -                                                                               | - L R R T S S A S F - - - - -                                                                   |                 | 276 |
| BnbZIP12d | P K W K - - - - -                                                                               | - L R R T S T A S F - - - - -                                                                   |                 | 272 |
| BnbZIP14a | P K K N - - - - -                                                                               | - T L Q R S S S A L F - - - - -                                                                 |                 | 263 |
| BnbZIP14b | P K K N - - - - -                                                                               | - T L Q R A S T A P F - - - - -                                                                 |                 | 281 |
| BnbZIP14c | P K K N - - - - -                                                                               | - T L Q R S S T A P F - - - - -                                                                 |                 | 243 |
| BnbZIP14d | P K K K - - - - -                                                                               | - T L Q R S S T S P F - - - - -                                                                 |                 | 270 |
| BnbZIP14e | P K K N - - - - -                                                                               | - T L Q R A S T A P F - - - - -                                                                 |                 | 259 |
| BnbZIP14f | P K K K - - - - -                                                                               | - T L Q R S S T A P F - - - - -                                                                 |                 | 262 |
| BnbZIP27b | Q T K R - - - - -                                                                               | - K L Q R S W I T P F - - - - -                                                                 |                 | 231 |
| BnbZIP27a | Q T K K - - - - -                                                                               | - I L Q R S W T S P F - - - - -                                                                 |                 | 182 |
| BnbZIP38e | S K R Q - - - - -                                                                               | - C L R R T L T G P W - - - - -                                                                 |                 | 354 |
| BnbZIP38f | S K R Q - - - - -                                                                               | - C L R R T L T G P W - - - - -                                                                 |                 | 391 |
| BnbZIP37a | C K R Q - - - - -                                                                               | - C L R R T S T G P W - - - - -                                                                 |                 | 410 |
| BnbZIP37b | C K R Q - - - - -                                                                               | - C L R R T L T G P W - - - - -                                                                 |                 | 350 |
| BnbZIP37c | C K R Q - - - - -                                                                               | - C L R R T L T G P W - - - - -                                                                 |                 | 349 |
| BnbZIP38a | S K R Q - - - - -                                                                               | - C L R R T L T G P W - - - - -                                                                 |                 | 355 |
| BnbZIP38b | S K R Q - - - - -                                                                               | - C L R R T L T G P W - - - - -                                                                 |                 | 354 |
| BnbZIP38c | S K R Q - - - - -                                                                               | - C L R R T L T G P W - - - - -                                                                 |                 | 352 |
| BnbZIP38d | S K R Q - - - - -                                                                               | - C L R R T L T G P W - - - - -                                                                 |                 | 364 |
| BnbZIP39a | P K A S G - - - - -                                                                             | - R L R T L V R N P S C P L - - - - -                                                           |                 | 404 |
| BnbZIP39b | P K V S G - - - - -                                                                             | - R L R T L M R N P S C P L - - - - -                                                           |                 | 394 |
| BnbZIP39c | P K V S G - - - - -                                                                             | - R L R T L M R N P S C P L - - - - -                                                           |                 | 399 |
| BnbZIP40a | E K R K P S S - - - - -                                                                         | - S S S R S L S R S H S L E W - - - - -                                                         |                 | 268 |
| BnbZIP40b | E K R K P S S - - - - -                                                                         | - S A S R S L S R S H S L E W - - - - -                                                         |                 | 269 |
| BnbZIP66a | P K R Q - - - - -                                                                               | - L R R T S S A P F - - - - -                                                                   |                 | 290 |
| BnbZIP66b | P K R Q - - - - -                                                                               | - L R R T S S A P F - - - - -                                                                   |                 | 250 |
| BnbZIP66c | P K R Q - - - - -                                                                               | - L R R T S S A P F - - - - -                                                                   |                 | 251 |
| BnbZIP66d | P K R Q - - - - -                                                                               | - L R R T S S A P F - - - - -                                                                   |                 | 259 |
| BnbZIP66e | P K R Q - - - - -                                                                               | - L R R T S S A P F - - - - -                                                                   |                 | 271 |
| BnbZIP66f | P K R Q - - - - -                                                                               | - L R R T S S A P F - - - - -                                                                   |                 | 247 |
| BnbZIP67a | E K N G D - - - - -                                                                             | - K L R R I R R M A S A G W - - - - -                                                           |                 | 346 |
| BnbZIP67b | E K N G D - - - - -                                                                             | - K L R R I R R M A S A G W - - - - -                                                           |                 | 346 |
| BnbZIP17a | R T L R G L - - - - -                                                                           | - A I P L P G S - - - - E H Q R N S S S K E - - - - I K P V S - S M V V S -                     |                 | 550 |
| BnbZIP17b | R T L R G L - - - - -                                                                           | - A I P L P G S D F N F T K E H Q R N S S S K E - - - - I K A A S - S M V V S -                 |                 | 543 |
| BnbZIP17c | R T L R G L - - - - -                                                                           | - P I P L P G S D F N F T K E H Q R N S S S K E - - - - I K P A S - S M V V S -                 |                 | 546 |
| BnbZIP28a | R I L E G L - - - - -                                                                           | - P V S R L A S E L N I T E A Q A S K D A Q N K S F H G K D N T K P T S S S M V V S -           |                 | 540 |
| BnbZIP28b | R I L E G L - - - - -                                                                           | - P V S R L A S E L N I T E A Q A S K D A Q N K T F H G K A N T K P T S S S M V V S -           |                 | 580 |
| BnbZIP49a | R I L R G - - - - -                                                                             | - G H P L S D N L T K D Q N N S S K D N F S T - - - - T K P F P - S M V V S -                   |                 | 407 |
| BnbZIP49b | R I L R G - - - - -                                                                             | - G H P L S N L N L S K D Q N S S N K E N S S T - - - - N K S F P - S M V V S -                 |                 | 395 |
| BnbZIP9a  | I K V K L A E D L V A R G S L T S S L - - - - -                                                 | - N Q L L Q T H L S P S P Q S I N - - - - -                                                     |                 | 227 |
| BnbZIP9b  | I K V K L A E D L V A R G S F T S S L - - - - -                                                 | - N Q L L Q T H L S P S P Q S I N - - - - -                                                     |                 | 227 |
| BnbZIP9c  | V K V K L A E D L I A R G S L T S S L - - - - -                                                 | - N Q L L Q T H L S P P Q H S I N - - - - -                                                     |                 | 226 |
| BnbZIP9d  | V K V K L A E D L I A R G S L T S S L - - - - -                                                 | - N Q L L Q T H L S P P Q H S I N - - - - -                                                     |                 | 226 |
| BnbZIP10a | A K V K M A E E T V K R V T G M N P M - - - - -                                                 | - L L G R S N G H N N N N N - R M P L T G N S R M G G - - - - S S C I P P F Q P Q S N P N M G - |                 | 329 |
| BnbZIP10b | A K V K M A E E T V K R V T G M N P M - - - - -                                                 | - L L G R S N G H N N N N N R M P L T G N S R M G - - - - S S C I P P F Q P Q S N L N M G -     |                 | 329 |
| BnbZIP25a | T K V K M V E E T V K R V T G V N P L - - - - -                                                 | - H W A R P N M G T P L N N T P I D S S - - - - -                                               |                 | 268 |
| BnbZIP25b | T K V K M A E E T V K R V T G V N P L - - - - -                                                 | - Q W A R P N M G M P V N N T P R - - - - -                                                     | - R I L P N S N | 340 |
| BnbZIP25c | T K V K M A E E T V K R V T G V N P L - - - - -                                                 | - Q W A R P N M G M P V N N T P R - - - - -                                                     |                 | 334 |
| BnbZIP25d | T K I M I L T K F M N P T D - - - - -                                                           | - - - - -                                                                                       |                 | 153 |
| BnbZIP25e | T K V K M A E D T V K R V T G M N P R - - - - -                                                 | - L L A K P - Y S I P F D R T L M G S - - - - -                                                 |                 | 324 |
| BnbZIP25f | - - - K M A E E T V K R V T R V N P S - - - - -                                                 | - R W R T R N M D I P L K R - - - - -                                                           |                 | 131 |
| BnbZIP63a | A K V K M A E E T V K R L T G F N P M - - - - -                                                 | - F Q T M P Q V S T V S N - - - - -                                                             |                 | 261 |
| BnbZIP63b | A K V K M A E E T V K R L T G F N P M - - - - -                                                 | - Y H T M P Q V S T V S N - - - - -                                                             |                 | 257 |
| BnbZIP63c | A K V K M A E E T V K R I T G F N P M - - - - -                                                 | - F H T M P Q V S S V S N - - - - -                                                             |                 | 255 |
| BnbZIP63d | A K V K M A E E T V K R I T G F N P M - - - - -                                                 | - F H T M P P V S T V S N - - - - -                                                             |                 | 259 |
| BnbZIP20a | A H A G D G E L L I I V D G - - - - V M A H Y E E L F R I K S N A A K N D V F H L L Y G M W K - |                                                                                                 |                 | 177 |
| BnbZIP20b | A H A G D G E L L I I V D G - - - - V M A H Y E E L F R I K S N A A K N D V F H L L Y G M W K - |                                                                                                 |                 | 178 |
| BnbZIP45d | A H A G D T E L R I I V E G - - - - V M S H Y E E L F R I K S N A A K N D V F H L L S G M W K - |                                                                                                 |                 | 181 |
| BnbZIP45e | A H A G D T E L R I I V E G - - - - V M S H Y E E L F R I K S A A K N D V F H L L S G M W K -   |                                                                                                 |                 | 181 |
| BnbZIP45a | A H A G D A E L L I I V D G - - - - V M T H Y E E L F R I K S N A A K N D V F H L L S G M W K - |                                                                                                 |                 | 184 |
| BnbZIP45b | A H A G D T E L R T I V D G - - - - A M A H Y E E L F R I K S N A A K N D V F H L L S G M W K - |                                                                                                 |                 | 181 |
| BnbZIP45c | A H A G D A E L L I I L D G - - - - V M T H Y E E L F R I K S N A A K N D V F H L L S G M W K - |                                                                                                 |                 | 183 |
| BnbZIP45f | A H A G D T E L R T I V D G - - - - V M A H Y E E L F R I K S N A A K N D V F H I L S G M W K - |                                                                                                 |                 | 204 |
| BnbZIP26a | S H A S E P E L R T I V E A - - - - V L A H Y E E L F R I K S N A A K N D V F H L L S G M W K - |                                                                                                 |                 | 176 |
| BnbZIP26b | S H A S E P E L R T I V E A - - - - V L A H Y E E L F R I K S N A A K N D V F H L L S G M W K - |                                                                                                 |                 | 176 |
| BnbZIP21a | A H L S D N D L R L I V D G - - - - Y I A H F D E V L R L K A V A A K A D V F H L I I G T W M - |                                                                                                 |                 | 308 |
| BnbZIP21b | A H L S D N D L R L I V D G - - - - Y I A H F D E V L R L K A V A V K A D V F H L I I G T W M - |                                                                                                 |                 | 308 |
| BnbZIP21c | A H L S D N D L R L I V D G - - - - Y I A H F D E V F R L K A V A A K A D V F H L I I G T W M - |                                                                                                 |                 | 314 |
| BnbZIP21d | A H L S D N D L R L I V D G - - - - Y I A H F D E V F R L K A V A A K A D V F H L I I G T W M - |                                                                                                 |                 | 258 |
| BnbZIP22a | A H I S D I E L K M L V D I - - - - C L N N Y A N L F R M K A D A A K A D V F F L I S G M W R - |                                                                                                 |                 | 237 |
| BnbZIP22b | A H I S D I E L K M L V D I - - - - C L N H Y A N L F R M K A D A A K A D V F F L I S G M W R - |                                                                                                 |                 | 270 |
| BnbZIP22c | A H I S D V E L K M L V D V - - - - C L N H Y A N L F R M K A A A K A D V F F L I S G M W R -   |                                                                                                 |                 | 227 |
| BnbZIP22d | A H I S D V E L K M L V D V - - - - C L N H Y A N L F R M K A D A A K A D V F F L I S G M W R - |                                                                                                 |                 | 226 |
| BnbZIP50c | A H I S D I E L K M L V E S - - - - C L N H Y A N L F R M K A D A A K A D V F Y L I S G M W R - |                                                                                                 |                 | 224 |
| BnbZIP50d | A H I S D I E L K M L V E S - - - - C L N H Y A N L F R M K S D A A K A D V F Y L I S G M W R - |                                                                                                 |                 | 224 |
| BnbZIP46a | S Q L G D N E L R V L V D A - - - - V M S H Y D E I F R L K G I G T K V D V F H M L S G M W Q - |                                                                                                 |                 | 292 |
| BnbZIP46b | S Q L G D N E L R V L V D A - - - - V M S H Y D E I F R L K G I G T K V D V F H M L S G M W Q - |                                                                                                 |                 | 292 |
| BnbZIP47a | G Q V S D V E L R L L V E N - - - - G M K H Y F D L F R M K S A A A K A D V F F V M S G M W R - |                                                                                                 |                 | 224 |
| BnbZIP47b | G H V T D V E L R S L V E N - - - - T M K H Y F E L F R M K S A A A K A D V F F V M S G M W R - |                                                                                                 |                 | 221 |
| BnbZIP47c | G Q V S D V E L R L L V E N - - - - G M K H Y F D L F R M K S A A A K A D V F F V M S G M W R - |                                                                                                 |                 | 224 |
| BnbZIP47d | G H V T D V E L R S L V E N - - - - T M K H Y F E L F R M K S A A A K A D V F F V M S G M W R - |                                                                                                 |                 | 221 |
| BnbZIP47e | G H V G D V E L R L L V E I - - - - A M K H Y F D L F R M K S A A A K E D V F F V M S G M W R - |                                                                                                 |                 | 243 |
| BnbZIP50b | A H I S D I E L R M L V E S - - - - C L N H Y A N L F R M K S D A A K A D V F Y L I S G M W R - |                                                                                                 |                 | 285 |
| BnbZIP50a | A H I S D I E L R M L V E S - - - - C L N H Y A N L F R M K S D A A K A D V F Y L I S G M W R - |                                                                                                 |                 | 299 |
| BnbZIP57a | G Q V S D V E L R L L V D N - - - - A M K H Y F Q L F R M K S A A A K I D V F Y I M S G M W K - |                                                                                                 |                 | 216 |
| BnbZIP57b | G Q V S D V E L R L L V D N - - - - A M K H Y F Q L F R M K S A A A K I D V F Y I M S G M W K - |                                                                                                 |                 | 216 |
| BnbZIP57c | G Q V S D I E L R L L V D N - - - - A M K H Y F Q L F R M K S A A A K L D V F Y I M S G M W K - |                                                                                                 |                 | 218 |
| BnbZIP57d | G Q V S D V E I R L L V D N - - - - A M K H Y F Q L F L M K S A A A K L D V F Y I M S G M W K - |                                                                                                 |                 | 218 |
| BnbZIP65a | E H L A E N E L R M F V D T - - - - C L A H Y D H L I N L K A M V A K T D V F H L I S G A W K - |                                                                                                 |                 | 296 |
| BnbZIP65b | E H L A E N E L R M F V D T - - - - C L A H Y D H L I N L K A M V A K T D V F H L I S G A W K - |                                                                                                 |                 | 296 |
| BnbZIP65c | E H L A E N E L R M F V D N - - - - C L A H Y D H L I N L K A M V A K T D V F H L I S G A W K - |                                                                                                 |                 | 221 |



[illegible]

[illegible]

|           |                                                                                |                                          |          |     |
|-----------|--------------------------------------------------------------------------------|------------------------------------------|----------|-----|
| BnbZIP21b | TVHQLRRILTVR                                                                   | QAARCFVLVIG                              | EYYGRLLR | 438 |
| BnbZIP21c | TVHQLRRILTVR                                                                   | QAARCFVLVIG                              | EYYGRLLR | 444 |
| BnbZIP21d | TVHQLRQILTVR                                                                   | QAARCFLLIG                               | EYYGRLLR | 388 |
| BnbZIP22a | TLQQMSKILTTT                                                                   | QAARGLLALG                               | EYFHRLR  | 371 |
| BnbZIP22b | TLQQMSKILTTT                                                                   | QAARGLLALG                               | EYFHRLR  | 404 |
| BnbZIP22c | SLQQMSKVLTTT                                                                   | QAARGLLALG                               | EYFHRLR  | 358 |
| BnbZIP22d | SLQQMSKVLTTT                                                                   | QAARGLLALG                               | EYFHRLR  | 357 |
| BnbZIP50c | TLQQMAKILTTT                                                                   | QAARGLLCLG                               | EYLHRLR  | 357 |
| BnbZIP50d | AEEEQIKVAYRRLAKYYHPDVYDGKGTLEEGETAESRFIKI                                      | QAAYELMDTEKRRQYDTDNRVNPMKASQAWMEWLMKKRKA | FDQRGDMA | 474 |
| BnbZIP46a | TLQQLHRILTTT                                                                   | QAARAFVLIH                               | DYICRLR  | 430 |
| BnbZIP46b | TLQQLHRILTTT                                                                   | QAARAFVLIH                               | DYICRLR  | 430 |
| BnbZIP47a | TLQQMHRILTTT                                                                   | QAARGLLALG                               | EYFQRLR  | 356 |
| BnbZIP47b | TLQQMHRILTTT                                                                   | QAARGLLALG                               | EYFQRLR  | 353 |
| BnbZIP47c | TLQQMHRILTTT                                                                   | QAARGLLALG                               | EYFQRLR  | 356 |
| BnbZIP47d | TLQQMHRILTTT                                                                   | QAARGLLALG                               | EYFQRLR  | 353 |
| BnbZIP47e | TLQQMHRILTTT                                                                   | QAARGLLALG                               | EYFQRLR  | 375 |
| BnbZIP50b | TLQQMAKILTTT                                                                   | QSARGLLALG                               | EYLHRLR  | 416 |
| BnbZIP50a | TLQQMAKILTTT                                                                   | QSARGLLALG                               | EYLHRLR  | 430 |
| BnbZIP57a | TLQQMHRILTTT                                                                   | QAARGLLALG                               | EYFQRLR  | 348 |
| BnbZIP57b | TLQQMHRILTTT                                                                   | QAARGLLALG                               | EYFQRLR  | 348 |
| BnbZIP57c | TLQQMHRILTTT                                                                   | QAARGLLALG                               | EYFQRLR  | 350 |
| BnbZIP57d | TLQQMHRILTTT                                                                   | QAARGLLALG                               | EYFQRLR  | 350 |
| BnbZIP65a | TIHRLNQLLTTT                                                                   | QEARCILAVA                               | EYFHRLQ  | 437 |
| BnbZIP65b | TIHRLNQLLTTT                                                                   | QEARCILAVA                               | EYFHRLQ  | 437 |
| BnbZIP65c | SNPFLLFK                                                                       | TEVYTKLYQS                               | LYIKYI   | 352 |
| BnbZIP34a |                                                                                |                                          |          | 268 |
| BnbZIP34b |                                                                                |                                          |          | 268 |
| BnbZIP34c |                                                                                |                                          |          | 273 |
| BnbZIP34d |                                                                                |                                          |          | 280 |
| BnbZIP34e |                                                                                |                                          |          | 279 |
| BnbZIP61a |                                                                                |                                          |          | 298 |
| BnbZIP61b |                                                                                |                                          |          | 267 |
| BnbZIP61c |                                                                                |                                          |          | 284 |
| BnbZIP19a |                                                                                |                                          |          | 255 |
| BnbZIP19b |                                                                                |                                          |          | 271 |
| BnbZIP19c |                                                                                |                                          |          | 238 |
| BnbZIP23b |                                                                                |                                          |          | 239 |
| BnbZIP23a |                                                                                |                                          |          | 241 |
| BnbZIP23c |                                                                                |                                          |          | 248 |
| BnbZIP23d |                                                                                |                                          |          | 239 |
| BnbZIP24a |                                                                                |                                          |          | 188 |
| BnbZIP24b |                                                                                |                                          |          | 188 |
| BnbZIP16a |                                                                                |                                          |          | 459 |
| BnbZIP16b |                                                                                |                                          |          | 395 |
| BnbZIP16c |                                                                                |                                          |          | 401 |
| BnbZIP68a |                                                                                |                                          |          | 381 |
| BnbZIP68b |                                                                                |                                          |          | 383 |
| BnbZIP16d |                                                                                |                                          |          | 300 |
| BnbZIP16e |                                                                                |                                          |          | 153 |
| BnbZIP41a |                                                                                |                                          |          | 313 |
| BnbZIP41b |                                                                                |                                          |          | 313 |
| BnbZIP41c |                                                                                |                                          |          | 313 |
| BnbZIP41d |                                                                                |                                          |          | 313 |
| BnbZIP54a |                                                                                |                                          |          | 365 |
| BnbZIP54b |                                                                                |                                          |          | 363 |
| BnbZIP55a |                                                                                |                                          |          | 443 |
| BnbZIP55b |                                                                                |                                          |          | 414 |
| BnbZIP55c |                                                                                |                                          |          | 300 |
| BnbZIP56a |                                                                                |                                          |          | 164 |
| BnbZIP56b |                                                                                |                                          |          | 164 |
| BnbZIP56c |                                                                                |                                          |          | 166 |
| BnbZIP56d |                                                                                |                                          |          | 162 |
| BnbZIP64a |                                                                                |                                          |          | 150 |
| BnbZIP64b |                                                                                |                                          |          | 150 |
| BnbZIP64c |                                                                                |                                          |          | 175 |
| BnbZIP18a |                                                                                |                                          |          | 356 |
| BnbZIP18b |                                                                                |                                          |          | 355 |
| BnbZIP18c |                                                                                |                                          |          | 352 |
| BnbZIP18d |                                                                                |                                          |          | 343 |
| BnbZIP29a |                                                                                |                                          |          | 445 |
| BnbZIP29b |                                                                                |                                          |          | 441 |
| BnbZIP29c |                                                                                |                                          |          | 426 |
| BnbZIP29d |                                                                                |                                          |          | 438 |
| BnbZIP30a |                                                                                |                                          |          | 444 |
| BnbZIP30b |                                                                                |                                          |          | 442 |
| BnbZIP51a |                                                                                |                                          |          | 330 |
| BnbZIP51b |                                                                                |                                          |          | 322 |
| BnbZIP51c |                                                                                |                                          |          | 241 |
| BnbZIP69d |                                                                                |                                          |          | 392 |
| BnbZIP52a |                                                                                |                                          |          | 328 |
| BnbZIP52b |                                                                                |                                          |          | 325 |
| BnbZIP52c |                                                                                |                                          |          | 321 |
| BnbZIP52d |                                                                                |                                          |          | 318 |
| BnbZIP59a |                                                                                |                                          |          | 368 |
| BnbZIP59b |                                                                                |                                          |          | 371 |
| BnbZIP59c |                                                                                |                                          |          | 370 |
| BnbZIP59d |                                                                                |                                          |          | 318 |
| BnbZIP69a |                                                                                |                                          |          | 393 |
| BnbZIP69b |                                                                                |                                          |          | 393 |
| BnbZIP69c |                                                                                |                                          |          | 381 |
| BnbZIP1a  |                                                                                |                                          |          | 139 |
| BnbZIP1b  |                                                                                |                                          |          | 142 |
| BnbZIP1c  | QIKMMVVVLGELGGRDEYSLVEALKQGKVNKPVVAVWSGTCARLFKSEVQFGHAGAKSGGEMESAQAKNQALMDAGAI | VPTSFEALES                               | AIK      | 432 |
| BnbZIP1d  |                                                                                |                                          |          | 142 |
| BnbZIP2a  |                                                                                |                                          |          | 168 |
| BnbZIP2b  |                                                                                |                                          |          | 170 |
| BnbZIP2c  |                                                                                |                                          |          | 168 |
| BnbZIP2d  |                                                                                |                                          |          | 155 |
| BnbZIP3a  |                                                                                |                                          |          | 188 |
| BnbZIP3b  |                                                                                |                                          |          | 194 |
| BnbZIP3c  |                                                                                |                                          |          | 183 |
| BnbZIP3d  |                                                                                |                                          |          | 190 |
| BnbZIP3e  |                                                                                |                                          |          | 183 |
| BnbZIP3f  |                                                                                |                                          |          | 192 |
| BnbZIP3g  |                                                                                |                                          |          | 193 |
| BnbZIP4a  |                                                                                |                                          |          | 149 |
| BnbZIP5a  |                                                                                |                                          |          | 186 |
| BnbZIP7a  |                                                                                |                                          |          | 247 |
| BnbZIP7b  |                                                                                |                                          |          | 254 |
| BnbZIP7c  |                                                                                |                                          |          | 246 |
| BnbZIP7d  |                                                                                |                                          |          | 249 |
| BnbZIP11a |                                                                                |                                          |          | 153 |
| BnbZIP11b |                                                                                |                                          |          | 153 |
| BnbZIP11c |                                                                                |                                          |          | 154 |
| BnbZIP11d |                                                                                |                                          |          | 142 |
| BnbZIP11e |                                                                                |                                          |          | 142 |
| BnbZIP42a |                                                                                |                                          |          | 172 |
| BnbZIP42b |                                                                                |                                          |          | 172 |
| BnbZIP42c |                                                                                |                                          |          | 171 |
| BnbZIP44a |                                                                                |                                          |          | 176 |
| BnbZIP44b |                                                                                |                                          |          | 158 |

[illegible]



|           |     |
|-----------|-----|
| BnbZIP2c  | 168 |
| BnbZIP2d  | 155 |
| BnbZIP3a  | 188 |
| BnbZIP3b  | 194 |
| BnbZIP3c  | 183 |
| BnbZIP3d  | 190 |
| BnbZIP3e  | 183 |
| BnbZIP3f  | 192 |
| BnbZIP3g  | 193 |
| BnbZIP4a  | 149 |
| BnbZIP5a  | 186 |
| BnbZIP7a  | 247 |
| BnbZIP7b  | 254 |
| BnbZIP7c  | 246 |
| BnbZIP7d  | 249 |
| BnbZIP11a | 153 |
| BnbZIP11b | 153 |
| BnbZIP11c | 154 |
| BnbZIP11d | 142 |
| BnbZIP11e | 142 |
| BnbZIP42a | 172 |
| BnbZIP42b | 172 |
| BnbZIP42c | 171 |
| BnbZIP44a | 176 |
| BnbZIP44b | 158 |
| BnbZIP44c | 158 |
| BnbZIP44d | 179 |
| BnbZIP48a | 170 |
| BnbZIP48b | 170 |
| BnbZIP48c | 179 |
| BnbZIP48d | 179 |
| BnbZIP48e | 176 |
| BnbZIP48f | 176 |
| BnbZIP53a | 141 |
| BnbZIP53b | 141 |
| BnbZIP53c | 134 |
| BnbZIP53d | 134 |
| BnbZIP58a | 198 |
| BnbZIP58b | 198 |
| BnbZIP58c | 198 |
| BnbZIP58d | 163 |
| BnbZIP60a | 233 |
| BnbZIP60b | 242 |
| BnbZIP62a | 462 |
| BnbZIP62b | 459 |
| BnbZIP62c | 150 |
| BnbZIP36a | 302 |
| BnbZIP36b | 335 |
| BnbZIP13a | 286 |
| BnbZIP13b | 266 |
| BnbZIP8a  | 120 |
| BnbZIP70a | 221 |
| BnbZIP70b | 218 |
| BnbZIP70c | 183 |
| BnbZIP70d | 177 |
| BnbZIP72a | 149 |
| BnbZIP72b | 149 |
| BnbZIP27c | 180 |
| BnbZIP15a | 391 |
| BnbZIP15b | 395 |
| BnbZIP35a | 237 |
| BnbZIP35b | 330 |
| BnbZIP47f | 372 |
| BnbZIP19d | 273 |
| BnbZIP16f | 82  |
| BnbZIP64d | 150 |
| BnbZIP64e | 133 |
| BnbZIP18e | 334 |
| BnbZIP18f | 339 |
| BnbZIP30c | 307 |
| BnbZIP30d | 264 |
| BnbZIP30e | 372 |
| BnbZIP2e  | 168 |
| BnbZIP3h  | 162 |
| BnbZIP4b  | 149 |
| BnbZIP5b  | 195 |
| BnbZIP5c  | 204 |
| BnbZIP5d  | 168 |
| BnbZIP8b  | 120 |
| BnbZIP11f | 154 |
| BnbZIP11g | 142 |
| BnbZIP75a | 170 |
| BnbZIP75b | 164 |

|           | 1360 | 1370 |
|-----------|------|------|
| BnbZIP12a | 274  |      |
| BnbZIP12b | 282  |      |
| BnbZIP12c | 276  |      |
| BnbZIP12d | 272  |      |
| BnbZIP14a | 263  |      |
| BnbZIP14b | 281  |      |
| BnbZIP14c | 243  |      |
| BnbZIP14d | 270  |      |
| BnbZIP14e | 259  |      |
| BnbZIP14f | 262  |      |
| BnbZIP27b | 231  |      |
| BnbZIP27a | 182  |      |
| BnbZIP38e | 354  |      |
| BnbZIP38f | 391  |      |
| BnbZIP37a | 410  |      |
| BnbZIP37b | 350  |      |
| BnbZIP37c | 349  |      |
| BnbZIP38a | 355  |      |
| BnbZIP38b | 354  |      |
| BnbZIP38c | 352  |      |
| BnbZIP38d | 364  |      |
| BnbZIP39a | 404  |      |
| BnbZIP39b | 394  |      |
| BnbZIP39c | 399  |      |
| BnbZIP40a | 268  |      |
| BnbZIP40b | 269  |      |
| BnbZIP66a | 290  |      |
| BnbZIP66b | 250  |      |
| BnbZIP66c | 251  |      |
| BnbZIP66d | 259  |      |
| BnbZIP66e | 271  |      |
| BnbZIP66f | 247  |      |
| BnbZIP67a | 346  |      |
| BnbZIP67b | 346  |      |
| BnbZIP17a | 605  |      |

|           |           |     |
|-----------|-----------|-----|
| BnbZIP48f | - - - - - | 176 |
| BnbZIP53a | - - - - - | 141 |
| BnbZIP53b | - - - - - | 141 |
| BnbZIP53c | - - - - - | 134 |
| BnbZIP53d | - - - - - | 134 |
| BnbZIP58a | - - - - - | 198 |
| BnbZIP58b | - - - - - | 198 |
| BnbZIP58c | - - - - - | 198 |
| BnbZIP58d | - - - - - | 163 |
| BnbZIP60a | - - - - - | 233 |
| BnbZIP60b | - - - - - | 242 |
| BnbZIP62a | - - - - - | 462 |
| BnbZIP62b | - - - - - | 459 |
| BnbZIP62c | - - - - - | 150 |
| BnbZIP36a | - - - - - | 302 |
| BnbZIP36b | - - - - - | 335 |
| BnbZIP13a | - - - - - | 286 |
| BnbZIP13b | - - - - - | 266 |
| BnbZIP8a  | - - - - - | 120 |
| BnbZIP70a | - - - - - | 221 |
| BnbZIP70b | - - - - - | 218 |
| BnbZIP70c | - - - - - | 183 |
| BnbZIP70d | - - - - - | 177 |
| BnbZIP72a | - - - - - | 149 |
| BnbZIP72b | - - - - - | 149 |
| BnbZIP27c | - - - - - | 180 |
| BnbZIP15a | - - - - - | 391 |
| BnbZIP15b | - - - - - | 395 |
| BnbZIP35a | - - - - - | 237 |
| BnbZIP35b | - - - - - | 330 |
| BnbZIP47f | - - - - - | 372 |
| BnbZIP19d | - - - - - | 273 |
| BnbZIP16f | - - - - - | 82  |
| BnbZIP64d | - - - - - | 150 |
| BnbZIP64e | - - - - - | 133 |
| BnbZIP18e | - - - - - | 334 |
| BnbZIP18f | - - - - - | 339 |
| BnbZIP30c | - - - - - | 307 |
| BnbZIP30d | - - - - - | 264 |
| BnbZIP30e | - - - - - | 372 |
| BnbZIP2e  | - - - - - | 168 |
| BnbZIP3h  | - - - - - | 162 |
| BnbZIP4b  | - - - - - | 149 |
| BnbZIP5b  | - - - - - | 195 |
| BnbZIP5c  | - - - - - | 204 |
| BnbZIP5d  | - - - - - | 168 |
| BnbZIP8b  | - - - - - | 120 |
| BnbZIP11f | - - - - - | 154 |
| BnbZIP11g | - - - - - | 142 |
| BnbZIP75a | - - - - - | 170 |
| BnbZIP75b | - - - - - | 164 |
